# Supplementary material for: Mental health of adolescents: variations by borderline intellectual functioning and disability
Source: Springer Nature journal article supplement (doi:10.1007/s00787-019-01278-9), 2019-02-13
Supplement: MOESM2 [file 16468980]

**Table S2: Non-weighted descriptive statistics**

|  |  | **Disability** | | **Borderline IF** | |
| --- | --- | --- | --- | --- | --- |
|  |  | **No**  **n=2839** | **Yes**  **n=111** | **No**  **n=2688** | **Yes**  **n=262** |
| Sex | Male | 1431 | 69 | 1347 | 153 |
| Female | 1408 | 42 | 1341 | 109 |
|  |  | *χ2 =5.91, p=0.015* | | *χ2 =6.56, p=0.010* | |
| Parents in household | Two parents | 2400 | 86 | 2273 | 213 |
| Single parent | 439 | 25 | 415 | 49 |
|  |  | *χ2=4.02, p=0.045* | | *χ2 =1.92, p=0.166* | |
| Education of parents in home | 1+ parent completed secondary schooling | 2109 | 74 | 2035 | 148 |
| No parent completed secondary schooling | 730 | 37 | 653 | 114 |
|  |  | *χ2=3.22, p=0.073* | | *χ2=45.83, p<0.001* | |
| Ethnicity | Australia | 1927 | 83 | 1828 | 182 |
| Anglo/Europe | 499 | 20 | 476 | 43 |
| Visible other | 358 | 6 | 338 | 26 |
| Indigenous | 55 | 2 | 46 | 11 |
|  |  | *χ2=5.26,p=0.154* | | *χ2=9.31, p=0.025* | |
| Area disadvantage | 1 – most disadvantaged | 698 | 23 | 634 | 87 |
| 2 | 527 | 22 | 499 | 50 |
| 3 | 432 | 22 | 409 | 45 |
| 4 | 571 | 14 | 535 | 50 |
| 5 – least disadvantaged | 611 | 30 | 611 | 30 |
|  |  | *χ2=6.73, p=0.151* | | *χ2=23.73, p<0.001* | |
