# Supplementary material for: Mental health of adolescents: variations by borderline intellectual functioning and disability
Source: Springer Nature journal article supplement (doi:10.1007/s00787-019-01278-9), 2019-02-13
Supplement: MOESM5 [file 16468980]

**Table S5: Mean and linear regression of association between disability/BIF status and mental health and emotional and behavioural difficulties** **(95%% CI)**

|  |  | |  |
| --- | --- | --- | --- |
|  | **Mean (SD)** | | **Crude β coefficient**  **(95% CI)** | **Adjusted β coefficient**  **(95%CI)** § |
|  | **No Disability** | **Disability** |
| *Mental health* |  |  |  |  |
| Anxiety symptoms | 6.0 (4.7) | 6.4 (5.0) | 0.44 (-0.67, 1.55) | 0.77 (-0.30, 1.83) |
| Depressive symptoms | 5.5 (6.7) | 6.2 (6.8) | 0.66 (-0.90, 2.23) | 0.65 (-0.85, 2.15) |
| *Emotional and behavioural difficulties* | | | |  |
| Total Difficulties: Adolescenta | 9.9 (6.0) | 12.2 (6.0) | 2.28 (1.00, 3.55) | 2.16 (0.93, 3.40) |
| Total Difficulties: Parentb | 7.1 (5.3) | 11.7 (7.5) | 4.60 (2.86, 6.33) | 4.27 (2.53, 6.02) |
| Emotional Symptoms: Adolescenta | 2.9 (2.4) | 3.2 (2.2) | 0.29 (-0.22, 0.81) | 0.43 (-0.08, 0.93) |
| Emotional Symptoms: Parentb | 1.9 (1.9) | 2.8 (2.3) | 0.89 (0.42, 1.36) | 0.88 (0.41, 1.36) |
| Conduct Problems: Adolescenta | 1.5 (1.6) | 2.3 (1.8) | 0.81 (0.43, 1.18) | 0.70 (0.32, 1.07) |
| Conduct Problems: Parentb | 1.0 (1.4) | 1.9 (2.3) | 0.92 (0.37, 1.48) | 0.86 (0.30, 1.41) |
|  | **Mean (SD)** | | **Crude β coefficient**  **(95% CI)** | **Adjusted β coefficient**  **(95%CI)** § |
|  | **No BIF** | **BIF** |
| *Mental health* |  |  |  |  |
| Anxiety symptoms | 6.0 (4.8) | 5.6 (4.2) | -0.40 (-0.99, 0.19) | -0.07 (-0.61, 0.47) |
| Depressive symptoms | 5.5 (6.8) | 5.6 (5.4) | 0.12 (-0.78, 1.01) | 0.14 (-0.72, 1.01) |
| *Emotional and behavioural difficulties* | | |  |  |
| Total Difficulties: Adolescenta | 9.8 (6.0) | 11.7 (5.1) | 1.86 (1.09, 2.63) | 1.77 (1.01, 2.54) |
| Total Difficulties: Parentb | 6.9 (5.2) | 10.7 (6.3) | 3.77 (2.66, 4.87) | 3.36 (2.30, 4.43) |
| Emotional Symptoms: Adolescenta | 2.9 (2.4) | 3.0 (2.0) | 0.11 (-0.13, 0.42) | 0.25 (-0.3, 0.53) |
| Emotional Symptoms: Parentb | 1.9 (1.9) | 2.6 (2.0) | 0.71 (0.39, 1.03) | 0.71 (0.40, 1.01) |
| Conduct Problems: Adolescenta | 1.5 (1.6) | 2.2 (1.5) | 0.70 (0.46, 0.94) | 0.59 (0.36, 0.82) |
| Conduct Problems: Parentb | 1.0 (1.4) | 1.7 (1.8) | 0.75 (0.42, 1.07) | 0.67 (0.35, 0.99) |

§ Models adjusted for: gender, household type, parental education, ethnicity, area SEP

¶ Higher scores denote worse EBD

a Outcome was self-reported by the adolescent

b Outcome reported by parent
